# Supplementary material for: Contrasting thinning patterns between lake- and land-terminating glaciers in the Bhutanese Himalaya
Source: Copernicus journal article supplement (doi:10.5194/tc-13-2733-2019), 2019-10-18
Supplement: Supplementary file 2 [file tc-13-2733-2019-supplement.zip]

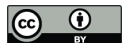

## *Supplement of*

# **Contrasting thinning patterns between lake- and land-terminating glaciers in the Bhutanese Himalaya**

**Shun Tsutaki et al.**

*Correspondence to:* Shun Tsutaki ([tsutshun@frontier.hokudai.ac.jp](mailto:tsutshun@frontier.hokudai.ac.jp)) and Koji Fujita ([cozy@nagoya-u.jp](mailto:cozy@nagoya-u.jp))

- tc-13-2733-2019-supplement-title-page.pdf
- \_\_MACOSX
  - .\_tc-2018-15\_supplyment
  - tc-2018-15\_supplyment
    - \* .\_tc-2018-15\_supplyment.pdf
    - \* .\_tc-2018-15\_supplyment.xlsx
- tc-2018-15\_supplyment
  - tc-2018-15\_supplyment.pdf
  - tc-2018-15\_supplyment.xlsx

The copyright of individual parts of the supplement might differ from the CC BY 4.0 License.
